# Supplementary material
Source: PubMed Central journal article supplement (PMC3207700)
Supplement: 1110594108_Appendix.pdf [file 1110594108_Appendix.pdf]

Supplimentary Online Material:  
Lattice Thermal Conductivity of Lower Mantle Minerals  
and Heat Flux from Earth's Core

M. A. G. M. Manthilake, N. de Koker, D. J. Frost, C. A. McCammon

1 **S1 Sample Preparation**

2 **S1.1 Ferropericlase**

3 Ferropericlase (FPe) samples were prepared using as starting materials magnesium  
4 and ferric oxides mixed in the desired mole ratios. These oxide mixtures were cold  
5 pressed into thin pellets, and kept at 1573 K in a gas mixing furnace for 24 hours.  
6 The oxygen fugacity of the sample was kept at two log units below the FMQ-buffer by  
7 adjusting the the CO<sub>2</sub>/CO gas mixure in the furnace. Samples were then quenched  
8 in water and analyzed by X-ray powder diffraction to indentify the phases present.  
9 This procedure was repeated until pure ferropericlase was obtained (usually 2 - 3  
10 times). The synthesised ferropericlase powder was hot pressed in an Fe-foil capsule  
11 at 5 GPa and 1073 K in a multi-anvil apparatus for about 30 minutes to obtain a  
12 well-synthesized cylindrical sample for thermal diffusivity measurements.

13 Prior to thermal diffusivity measurements, analysis by Mössbauer spectroscopy  
14 indicated Fe<sup>+3</sup>/∑Fe of 2.6±1.5 for X<sub>Fe</sub>=0.05 and 3.6±1.5 for X<sub>Fe</sub>=0.2. Character-  
15 ization by X-ray diffraction following the measurements indicated all ferropericlase  
16 samples to be single phase, and chemical composition was confirmed by electron  
17 probe microanalysis. Mössbauer spectroscopy indicate Fe<sup>+3</sup> concentrations smaller  
18 than the uncertainty of measurement.

19 **S1.2 Silicate Perovskite**

20 Three perovskite compositions, MgSiO<sub>3</sub>, MgSiO<sub>3</sub> + 3% FeSiO<sub>3</sub>, and MgSiO<sub>3</sub> + 2%  
21 AlAlO<sub>3</sub> were synthesized for thermal diffusivity measurements. Synthesis of per-  
22 ovskite samples involved several steps. First, a glass was prepared by mixing oxides  
23 in the desired mole ratios and heating to 1923 K in an atmospheric furnace. MgSiO<sub>3</sub>

24 + 3% FeSiO<sub>3</sub> glass powder was subsequently reduced in a gas mixing furnace with a  
 25 H<sub>2</sub>/CO<sub>2</sub> gas mixture at 1473 K. These glass samples were hot pressed at 5 GPa and  
 26 1473 K in a multi-anvil apparatus to synthesize polycrystalline enstatite, which was  
 27 then used to synthesize perovskite at 26 GPa and 1973 K.

28 Synthesised perovskite samples were characterized by both Raman spectroscopy  
 29 and density measurements prior to thermal diffusivity measurements. After mea-  
 30 surements were completed samples were again characterized by X-ray powder diffrac-  
 31 tometry and electron probe microanalysis to confirm the presence of a single phase.  
 32 Mössbauer spectroscopy of the Fe-bearing perovskite indicated Fe<sup>+3</sup>/ΣFe of 19.0±4.0.

## 33 S2 Experimental Method

34 Measurements of thermal diffusivity were performed using the Ångström method  
 35 (e.g. Fujisawa et al., 1968), in which a sinusoidally varying temperature with angular  
 36 frequency  $\omega = 2\pi f$  is applied to the circumference of a cylindrical sample, and the  
 37 phase lag ( $\Phi$ ) and amplitude ratio ( $\Theta$ ) in the temperature signal measured at radii  
 38  $r_1$  and  $r_2$  in the sample. Thermal diffusivity  $D$  is determined by solving

$$\Phi = \Phi_{r_1} - \Phi_{r_2} = \tan^{-1} [\text{bei}(u)/\text{ber}(u)], \quad (\text{S1})$$

$$\Theta = \frac{\Theta_{r_1}}{\Theta_{r_2}} = \frac{1}{\sqrt{\text{bei}^2(u) + \text{ber}^2(u)}}, \quad (\text{S2})$$

$$u = (r_2 - r_1) \sqrt{\frac{\omega}{D}}. \quad (\text{S3})$$

41 for  $u$ , with  $\text{ber}(u)$  and  $\text{bei}(u)$  the real and imaginary Kelvin functions (e.g. Zhang and  
 42 Jin, 1996). Thermal conductivity is then obtained as  $\mathcal{K} = \rho C_P D$ . To compute  $\rho$  and  
 43  $C_P$  at  $P$  and  $T$ , and to adjust  $r_2 - r_1$  for the effect of compression, a thermodynamic  
 44 model is used (see below).

45 Sample dimensions used for the measurements were 3.5 mm in diameter and 3.5  
 46 mm in length for ferropericlase, and 2.5 mm in diameter and 2.5 mm in length for  
 47 perovskite. Pre-synthesized cylindrical samples were cut into two halves along the  
 48 axial direction and a vertical groove made to accommodate an inner thermocouple;  
 49 the outer thermocouple was placed along the surface of the sample. Thermocouples  
 50 were fabricated from 0.05 mm diameter W<sub>97</sub>Re<sub>3</sub>-W<sub>75</sub>Re<sub>25</sub> wires.

51 Measurements were performed using the 5000 tonne press at the Bayerisches  
 52 Geoinstitut (Frost et al., 2004). For measurements of ferropericlase at 8 and 14 GPa,  
 53 we used a 25/15 multi-anvil configuration (Figure S1). Measurements of perovskite

54 samples were performed using a modified 18/8 configuration at 26 GPa, which al-  
 55 lowed the measurement to be made within the stability field of silicate perovskite.  
 56 A stepped geometry was used for the furnace to reduce the temperature gradient in  
 57 the axial direction and minimize the axial heat flow. The furnace was supplied with  
 58 a 1 KHz alternating current, with a superimposed low-frequency modulation of the  
 59 heater current to generate the temperature oscillation needed for thermal diffusivity  
 60 measurements. Modulation frequencies of 0.1, 0.4, 0.7, 1.0 and 1.3 Hz were used for  
 61 this.

62 The experimental procedures for thermal diffusivity measurements were as fol-  
 63 lows. Samples were first compressed at room temperature to the desired pressure.  
 64 Once the assemblage is stable at this pressure, the thermal conductivity is measured  
 65 as a function of temperature. In the case of ferropericlase, diffusivity measurements  
 66 were made during heating and cooling in 100 K steps up to 1273 K; for perovskite  
 67 samples were first heated to 1273 K, with thermal diffusivity measured made during  
 68 cooling. At each temperature, samples were allowed to reach steady state before  
 69 measurements were taken (Figure S2). Amplitude and the phase at each modulation  
 70 frequency were obtained by fitting 10 sinusoidal cycles to the fitting equation,

$$T_r = T_r^0 + T_r^1 t + \Theta_r \sin(\omega t + \Phi_r). \quad (\text{S4})$$

71 where  $T$  is temperature,  $t$  time, and  $\omega$ ,  $\Theta_r$  and  $\Phi_r$  are angular frequency, amplitude  
 72 and phase of the temperature oscillation, respectively. Amplitude ratio  $\Theta$  and phase  
 73 shift  $\Phi$  were then calculated by dividing inner amplitude by outer amplitude and  
 74 subtracting outer phase from inner phase, respectively. Uncertainty in each individual  
 75 measurement of  $k$  is estimated to be around 5 % (Xu et al., 2004). After each  
 76 experiment, a cross section normal to the axis of the sample cylinder was made  
 77 in order to determine the distance between the two thermocouples. The thermal  
 78 diffusivity is then found as the mean of the values determined for each frequency.

79 In experiments where thermal diffusivity was found to depend on the modulation  
 80 frequency due to axial end-effects (interference from top and bottom of the cylinder)  
 81 we determined the limiting diffusivity at infinite frequency  $D_\infty$  through fitting the  
 82 relation

$$D = D_\infty + A_0 \exp(A_1 f), \quad (\text{S5})$$

83 to our results. In some instances the data is scattered such that the optimal  $D_\infty$   
 84 value is very different from the data. Where this is the case, we determine the mean  
 85 diffusivity instead. This is the case for amplitude ratio data in Fig. S5 and phase  
 86 lag data in Fig. S6. There are also some cases where the data is scattered such that

87 Eq. S5 does not provide a reliable fit, or where the optimal  $D_\infty$  is indistinguishable  
 88 from the mean. Here again we choose to use the mean diffusivity. This is the case  
 89 for phase lag data in Figs. S4, S7 and S8.

90 Where diffusivity values thus derived differ for amplitude ratio and phase lag,  
 91 the differences cannot be only accounted for by only the additional radiative transfer  
 92 of heat. These differences likely arise due to scatter in the frequency dependent  
 93 diffusivity data, so that the mean diffusivity values do not correctly reflect the true  
 94 values. Based on the differences between phase lag and amplitude ration values,  
 95 we estimate these discrepancies to be less than 10%, within our final estimates of  
 96 uncertainty (see text).

### 97 **S3 Thermodynamic Treatment**

98 We use a Mie-Grüneisen formulation for the Helmholtz free energy  $F$  to construct  
 99 thermodynamic models for each of the phases considered in our measurements (Ita  
 100 and Stixrude, 1992; Stixrude and Lithgow-Bertelloni, 2005). This approach which  
 101 ensures that all thermodynamic information can be derived self-consistently by Leg-  
 102 endre transformations and differentiation (Callen, 1985). The relation for a single  
 103 phase is

$$F = F_0(V_0, T_0) + F_c(V, T_0) + F_{th}(V, T) - F_{th}(V, T_0), \quad (\text{S6})$$

104 where  $F_c$  describes isothermal compression

$$F_c(V, T_0) = \frac{9K_0V_0}{2} [f^2 + a_1f^3], \quad (\text{S7})$$

105

$$f = \frac{1}{2} \left[ \left( \frac{V_0}{V} \right)^{\frac{2}{3}} - 1 \right]; \quad a_1 = (K'_0 - 4), \quad (\text{S8})$$

106 and  $F_{th}$  describes isochoric heating in the quasiharmonic approximation

$$F_{th}(V, T) = 9NR \left( \frac{T}{\theta} \right)^3 \int_0^{\frac{\theta}{T}} x^2 \ln [1 - \exp(-x)] dx. \quad (\text{S9})$$

107 The Debye temperature at volume  $V$  is obtained as

$$\theta = \theta_0 \exp \left[ - \int_{V_0}^V \gamma(V')/V' dV' \right], \quad (\text{S10})$$

108 with  $\gamma(V)$  expressed through the finite strain based form of Stixrude and Lithgow-  
 109 Bertelloni (2005)

$$\gamma = \frac{\gamma'_0 + (2\gamma'_0 + \gamma'_1) f + 2\gamma'_1 f^2}{3(2 + 2\gamma'_0 f + \gamma'_1 f^2)}, \quad (\text{S11})$$

110  $\gamma'_0$  and  $\gamma'_1$  being constants with

$$\gamma_0 = \frac{1}{6}\gamma'_0; \quad q_0 = \frac{\gamma'_1 + 2\gamma'_0 - \gamma_0'^2}{-3\gamma'_0}. \quad (\text{S12})$$

111 This expression allows  $q$  to vary with density; first principles computations have  
112 shown it to better represent  $\gamma(V)$  compared to the more commonly used constant- $q$   
113 approximation (de Koker and Stixrude, 2009; Stixrude and Lithgow-Bertelloni, 2005;  
114 Oganov and Dorogokupets, 2003; Karki et al., 2000; Anderson, 1974).

115 Intermediate compositions are represented through free energy mixtures of models  
116 for endmembers MgO and FeO for ferropericlase, and MgSiO<sub>3</sub>, FeSiO<sub>3</sub> and AlAlO<sub>3</sub>  
117 for perovskite. Parameters used in representing each of these phases are taken from  
118 the database of Xu et al. (2008).

## 119 **S4 Experimental Data**

120 Thermal conductivities determined using amplitude ratio as well as phase lag are  
121 shown for each of the nine experiments in Figures S3 - S20. To avoid including effects  
122 due to direct thermal transfer, we use the amplitude ratio results in our modeling  
123 of the temperature dependence (Table 1). Agreement between  $k$  values determined  
124 from phase lag and from amplitude ratio values are generally within the experimental  
125 uncertainty, except for the Fe and Al containing silicate perovskite samples, where  $k$   
126 values derived from phase lag are higher than values derived from the amplitude ratio.  
127 This likely results from the fact that  $k$  in these samples is rather low, so that the  
128 contribution from direct radiative transfer seen in the phase lag signal is amplified.

Table S1: Parameters for the Mie-Grüneisen expression of the Helmholtz free energy, at ambient pressure and  $T_0 = 300$  K. Taken from Xu et al. (2008)

|                    | $V_0$ (cm <sup>3</sup> /mol) | $K_0$ (GPa) | $K'_0$ | $\theta_0$ (K) | $\gamma_0$ | $q_0$ |
|--------------------|------------------------------|-------------|--------|----------------|------------|-------|
| MgO                | 11.24                        | 161         | 3.9    | 772            | 1.48       | 1.6   |
| FeO                | 12.26                        | 179         | 4.9    | 454            | 1.54       | 1.6   |
| MgSiO <sub>3</sub> | 24.45                        | 251         | 4.1    | 901            | 1.44       | 1.4   |
| FeSiO <sub>3</sub> | 25.40                        | 272         | 4.1    | 765            | 1.44       | 1.4   |
| AlAlO <sub>3</sub> | 25.49                        | 228         | 4.1    | 886            | 1.44       | 1.4   |

Table S2: Thermal diffusivity in MgO

| $P$ (GPa) | $T$ (K) | $D_{\Phi}$ (mm <sup>2</sup> /s) | $D_{\Theta}$ (mm <sup>2</sup> /s) |
|-----------|---------|---------------------------------|-----------------------------------|
| 8         | 373     | 10.44 ± 0.28                    | 9.57 ± 0.24                       |
| 8         | 473     | 7.76 ± 0.19                     | 7.15 ± 0.18                       |
| 8         | 573     | 6.20 ± 0.16                     | 5.80 ± 0.15                       |
| 8         | 673     | 5.27 ± 0.13                     | 4.86 ± 0.12                       |
| 8         | 773     | 4.49 ± 0.11                     | 4.30 ± 0.11                       |
| 8         | 873     | 3.94 ± 0.10                     | 3.79 ± 0.09                       |
| 8         | 973     | 3.53 ± 0.09                     | 3.38 ± 0.08                       |
| 8         | 1073    | 3.18 ± 0.08                     | 3.03 ± 0.08                       |
| 8         | 1173    | 2.93 ± 0.07                     | 2.75 ± 0.07                       |
| 8         | 1273    | 2.75 ± 0.07                     | 2.48 ± 0.06                       |
| 14        | 373     | 12.58 ± 0.35                    | 11.73 ± 0.30                      |
| 14        | 473     | 9.35 ± 0.32                     | 8.16 ± 0.26                       |
| 14        | 573     | 7.61 ± 0.20                     | 7.20 ± 0.19                       |
| 14        | 673     | 6.38 ± 0.24                     | 6.02 ± 0.15                       |
| 14        | 773     | 5.44 ± 0.16                     | 5.34 ± 0.13                       |
| 14        | 873     | 4.79 ± 0.13                     | 4.76 ± 0.12                       |
| 14        | 973     | 4.32 ± 0.11                     | 4.19 ± 0.10                       |
| 14        | 1073    | 3.88 ± 0.01                     | 3.76 ± 0.09                       |
| 14        | 1173    | 3.57 ± 0.05                     | 3.43 ± 0.09                       |
| 14        | 1273    | 3.34 ± 0.05                     | 3.08 ± 0.08                       |

Table S3: Thermal diffusivity in  $\text{Mg}_{0.95}\text{Fe}_{0.05}\text{O}$

| $P$ (GPa) | $T$ (K) | $D_{\Phi}$ ( $\text{mm}^2/\text{s}$ ) | $D_{\Theta}$ ( $\text{mm}^2/\text{s}$ ) |
|-----------|---------|---------------------------------------|-----------------------------------------|
| 8         | 373     | $2.51 \pm 0.53$                       | $2.95 \pm 0.36$                         |
| 8         | 473     | $2.00 \pm 0.07$                       | $2.52 \pm 0.34$                         |
| 8         | 573     | $1.82 \pm 0.06$                       | $2.26 \pm 0.27$                         |
| 8         | 673     | $1.64 \pm 0.08$                       | $2.05 \pm 0.21$                         |
| 8         | 773     | $1.62 \pm 0.05$                       | $1.92 \pm 0.18$                         |
| 8         | 873     | $1.53 \pm 0.06$                       | $1.81 \pm 0.13$                         |
| 8         | 973     | $1.43 \pm 0.04$                       | $1.70 \pm 0.11$                         |
| 8         | 1073    | $1.36 \pm 0.04$                       | $1.54 \pm 0.04$                         |
| 14        | 373     | $3.81 \pm 0.14$                       | $3.32 \pm 0.09$                         |
| 14        | 473     | $3.27 \pm 0.20$                       | $3.03 \pm 0.08$                         |
| 14        | 573     | $2.98 \pm 0.05$                       | $2.82 \pm 0.07$                         |
| 14        | 673     | $2.72 \pm 0.17$                       | $2.64 \pm 0.07$                         |
| 14        | 773     | $2.40 \pm 0.08$                       | $2.47 \pm 0.06$                         |
| 14        | 873     | $2.19 \pm 0.07$                       | $2.28 \pm 0.06$                         |
| 14        | 973     | $2.03 \pm 0.05$                       | $2.22 \pm 0.06$                         |
| 14        | 1073    | $1.87 \pm 0.05$                       | $2.11 \pm 0.05$                         |
| 14        | 1173    | $1.76 \pm 0.04$                       | $1.98 \pm 0.05$                         |
| 14        | 1273    | $1.59 \pm 0.04$                       | $1.89 \pm 0.05$                         |



Table S4: Thermal diffusivity in  $\text{Mg}_{0.80}\text{Fe}_{0.20}\text{O}$

| $P$ (GPa) | $T$ (K) | $D_{\Phi}$ ( $\text{mm}^2/\text{s}$ ) | $D_{\Theta}$ ( $\text{mm}^2/\text{s}$ ) |
|-----------|---------|---------------------------------------|-----------------------------------------|
| 8         | 373     | $2.14 \pm 0.26$                       | $1.98 \pm 0.20$                         |
| 8         | 473     | $1.78 \pm 0.18$                       | $1.68 \pm 0.21$                         |
| 8         | 573     | $1.58 \pm 0.15$                       | $1.50 \pm 0.21$                         |
| 8         | 673     | $1.45 \pm 0.13$                       | $1.39 \pm 0.20$                         |
| 8         | 773     | $1.38 \pm 0.16$                       | $1.30 \pm 0.18$                         |
| 8         | 873     | $1.34 \pm 0.12$                       | $1.26 \pm 0.17$                         |
| 8         | 973     | $1.26 \pm 0.09$                       | $1.18 \pm 0.18$                         |
| 8         | 1073    | $1.21 \pm 0.11$                       | $1.12 \pm 0.19$                         |
| 8         | 1173    | $1.19 \pm 0.11$                       | $1.05 \pm 0.18$                         |
| 14        | 373     | $3.08 \pm 0.63$                       | $1.93 \pm 0.05$                         |
| 14        | 473     | $2.54 \pm 0.41$                       | $1.81 \pm 0.05$                         |
| 14        | 573     | $2.22 \pm 0.31$                       | $1.69 \pm 0.01$                         |
| 14        | 673     | $1.98 \pm 0.20$                       | $1.61 \pm 0.05$                         |
| 14        | 773     | $1.80 \pm 0.21$                       | $1.51 \pm 0.08$                         |
| 14        | 873     | $1.73 \pm 0.19$                       | $1.50 \pm 0.13$                         |
| 14        | 973     | $1.61 \pm 0.18$                       | $1.40 \pm 0.12$                         |
| 14        | 1073    | $1.54 \pm 0.26$                       | $1.31 \pm 0.10$                         |
| 14        | 1173    | $1.48 \pm 0.20$                       | $1.20 \pm 0.12$                         |
| 14        | 1273    | $1.42 \pm 0.16$                       | $1.11 \pm 0.12$                         |

Table S5: Thermal diffusivity in MgSiO<sub>3</sub>

| $P$ (GPa) | $T$ (K) | $D_{\Phi}$ (mm <sup>2</sup> /s) | $D_{\Theta}$ (mm <sup>2</sup> /s) |
|-----------|---------|---------------------------------|-----------------------------------|
| 26        | 473     | $3.37 \pm 0.24$                 | $3.47 \pm 0.10$                   |
| 26        | 573     | $2.90 \pm 0.09$                 | $2.90 \pm 0.08$                   |
| 26        | 673     | $2.58 \pm 0.12$                 | $2.55 \pm 0.07$                   |
| 26        | 773     | $2.38 \pm 0.10$                 | $2.30 \pm 0.06$                   |
| 26        | 873     | $2.23 \pm 0.07$                 | $2.13 \pm 0.06$                   |
| 26        | 973     | $2.11 \pm 0.07$                 | $1.99 \pm 0.05$                   |
| 26        | 1073    | $2.02 \pm 0.08$                 | $1.93 \pm 0.05$                   |

Table S6: Thermal diffusivity in MgSiO<sub>3</sub> + 3% FeSiO<sub>3</sub>

| $P$ (GPa) | $T$ (K) | $D_{\Phi}$ (mm <sup>2</sup> /s) | $D_{\Theta}$ (mm <sup>2</sup> /s) |
|-----------|---------|---------------------------------|-----------------------------------|
| 26        | 573     | $1.29 \pm 0.28$                 | $0.95 \pm 0.03$                   |
| 26        | 673     | $1.17 \pm 0.52$                 | $0.90 \pm 0.02$                   |
| 26        | 773     | $1.03 \pm 0.19$                 | $0.85 \pm 0.02$                   |
| 26        | 873     | $1.06 \pm 0.19$                 | $0.77 \pm 0.02$                   |
| 26        | 973     | $1.06 \pm 0.20$                 | $0.77 \pm 0.02$                   |

Table S7: Thermal diffusivity in MgSiO<sub>3</sub> + 2% AlAlO<sub>3</sub>

| $P$ (GPa) | $T$ (K) | $D_{\Phi}$ (mm <sup>2</sup> /s) | $D_{\Theta}$ (mm <sup>2</sup> /s) |
|-----------|---------|---------------------------------|-----------------------------------|
| 26        | 573     | $1.09 \pm 0.03$                 | $0.79 \pm 0.02$                   |
| 26        | 673     | $0.93 \pm 0.02$                 | $0.74 \pm 0.02$                   |
| 26        | 773     | $0.89 \pm 0.02$                 | $0.70 \pm 0.02$                   |
| 26        | 873     | $0.88 \pm 0.03$                 | $0.66 \pm 0.02$                   |
| 26        | 973     | $0.92 \pm 0.03$                 | $0.61 \pm 0.02$                   |

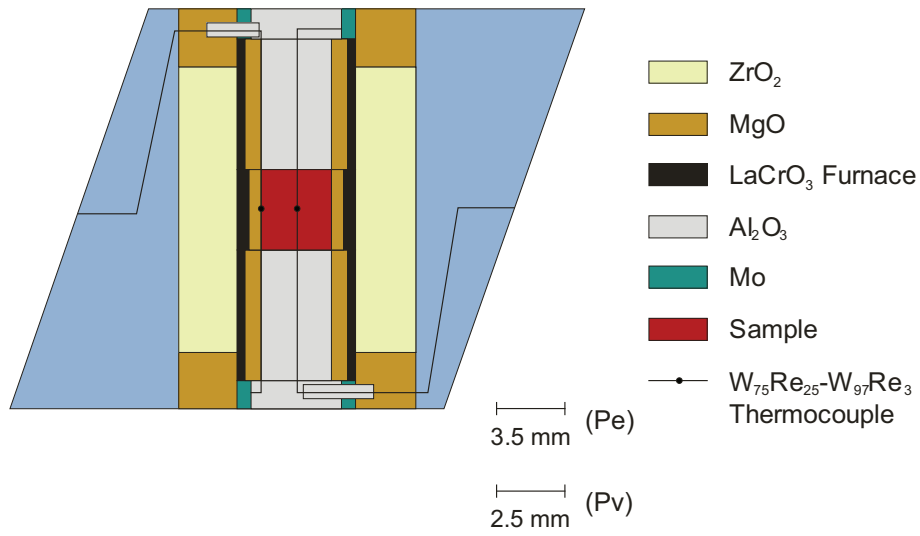

Figure S1: Schematic cross section of the high-pressure cell assembly for the thermal conductivity measurements. The ferropericlase samples used for the measurements at 8 and 14 GPa were 3.5 mm in length and diameter, while a smaller assembly with sample dimensions of 2.5 mm was needed to reach the 26 GPa pressure required for the silicate perovskite measurements.

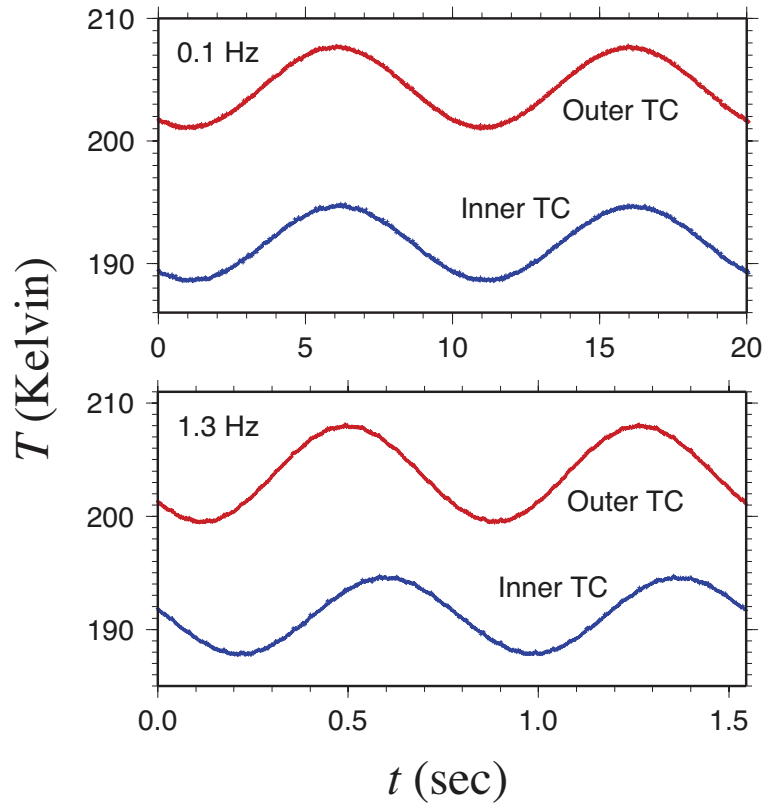

Figure S2: Examples of recorded temperature waves for  $\text{MgSiO}_3$  perovskite at frequencies of 0.1 and 1.3 Hz. At each temperature 10 cycles were collected, for a total of 2048 data points. Temperature readings of the outer thermocouple is always greater than that of the inner thermocouple; at the highest temperatures this difference reached a maximum of 30 K.

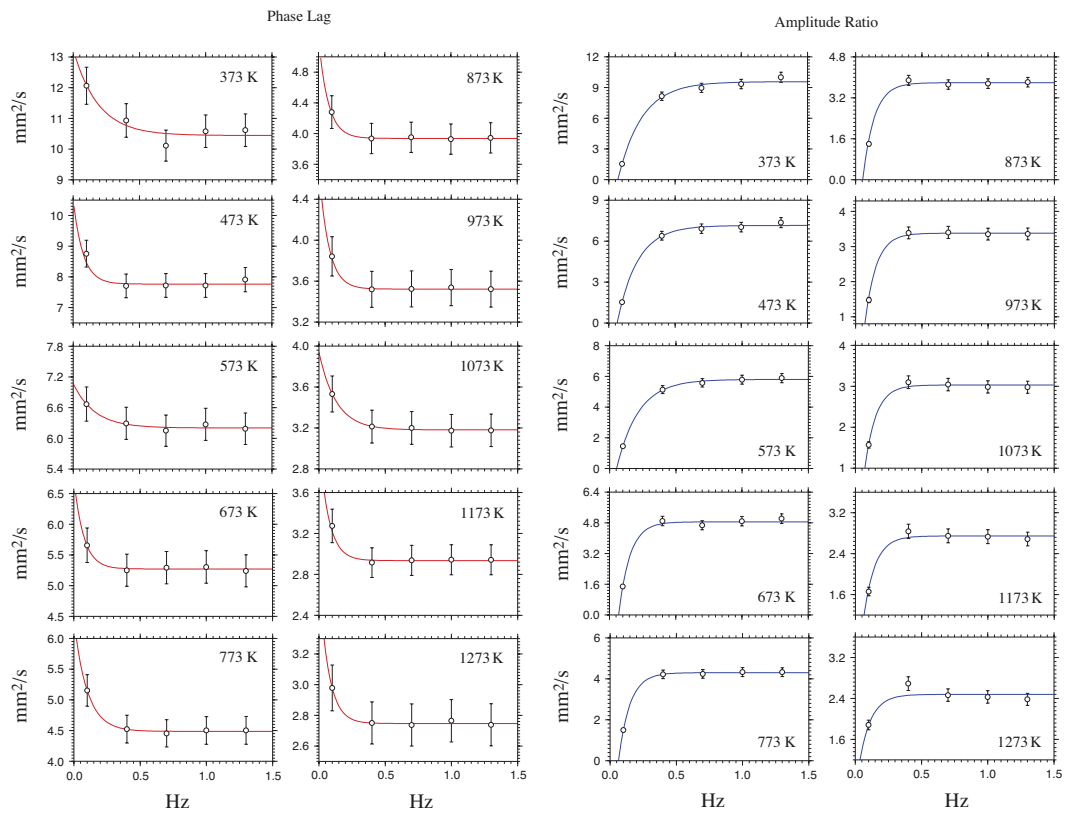

Figure S3: Thermal diffusivity of MgO at 8 GPa as a function of frequency, determined from phase lag and amplitude ratio measurements.

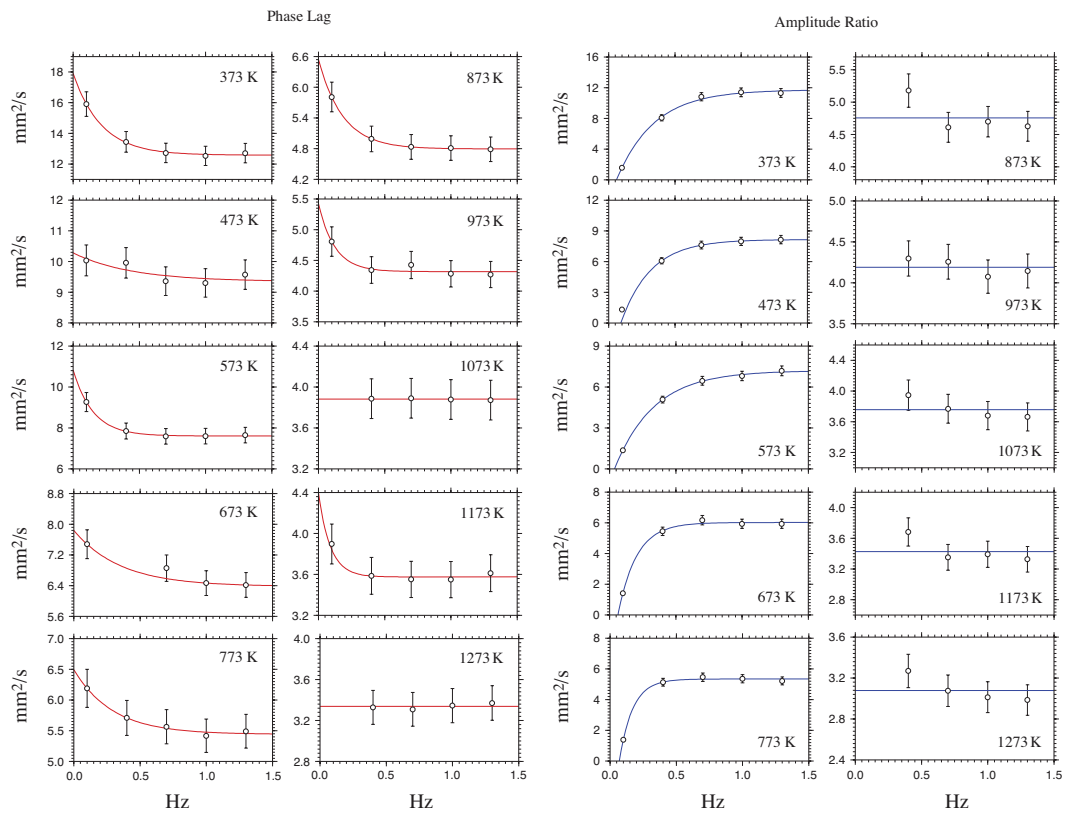

Figure S4: Thermal diffusivity of MgO at 14 GPa as a function of frequency, determined from phase lag and amplitude ratio measurements.

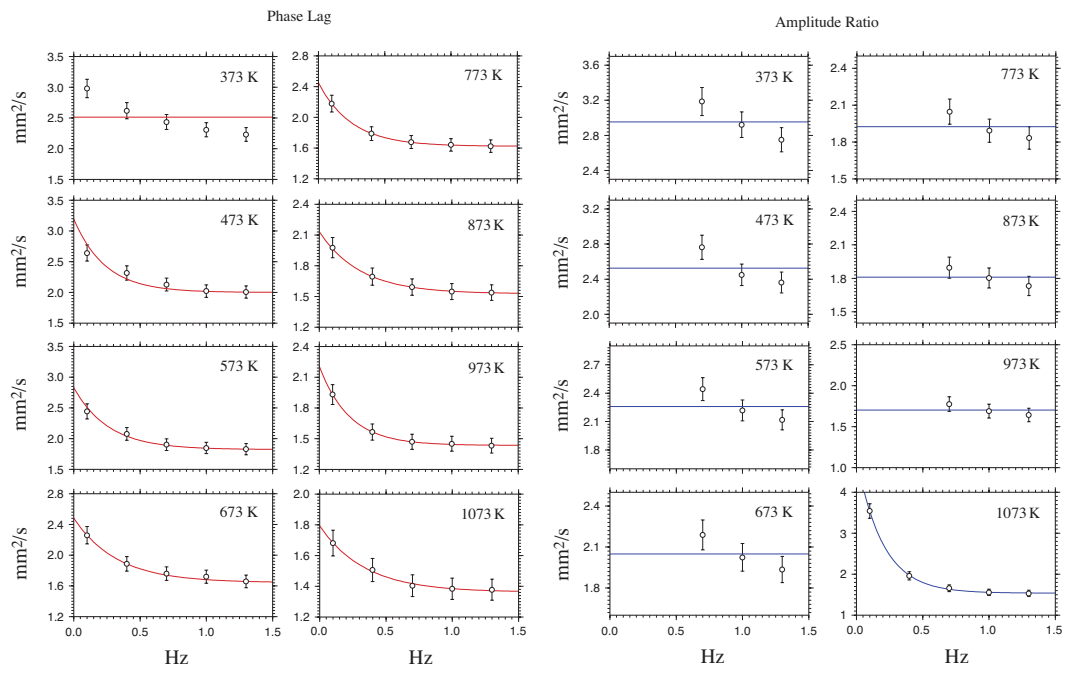

Figure S5: Thermal diffusivity of  $\text{Mg}_{0.95}\text{Fe}_{0.05}\text{O}$  at 8 GPa as a function of frequency, determined from phase lag and amplitude ratio measurements.

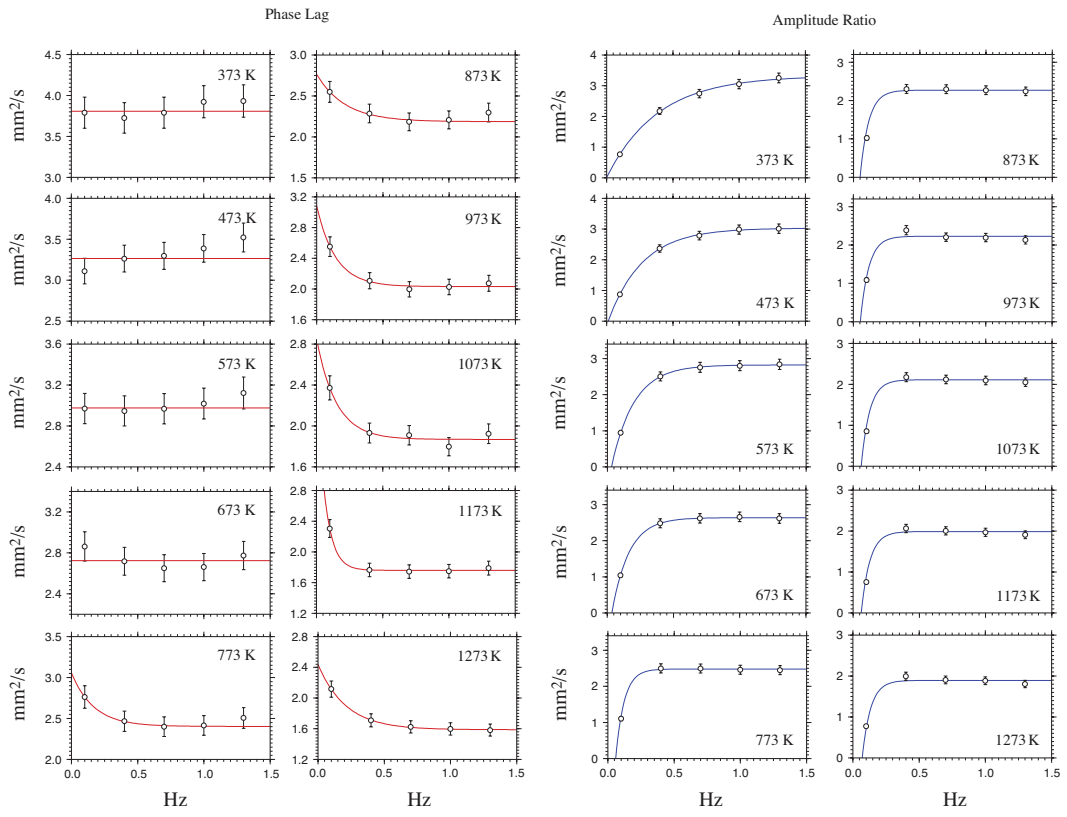

Figure S6: Thermal diffusivity of  $\text{Mg}_{0.95}\text{Fe}_{0.05}\text{O}$  at 14 GPa as a function of frequency, determined from phase lag and amplitude ratio measurements.



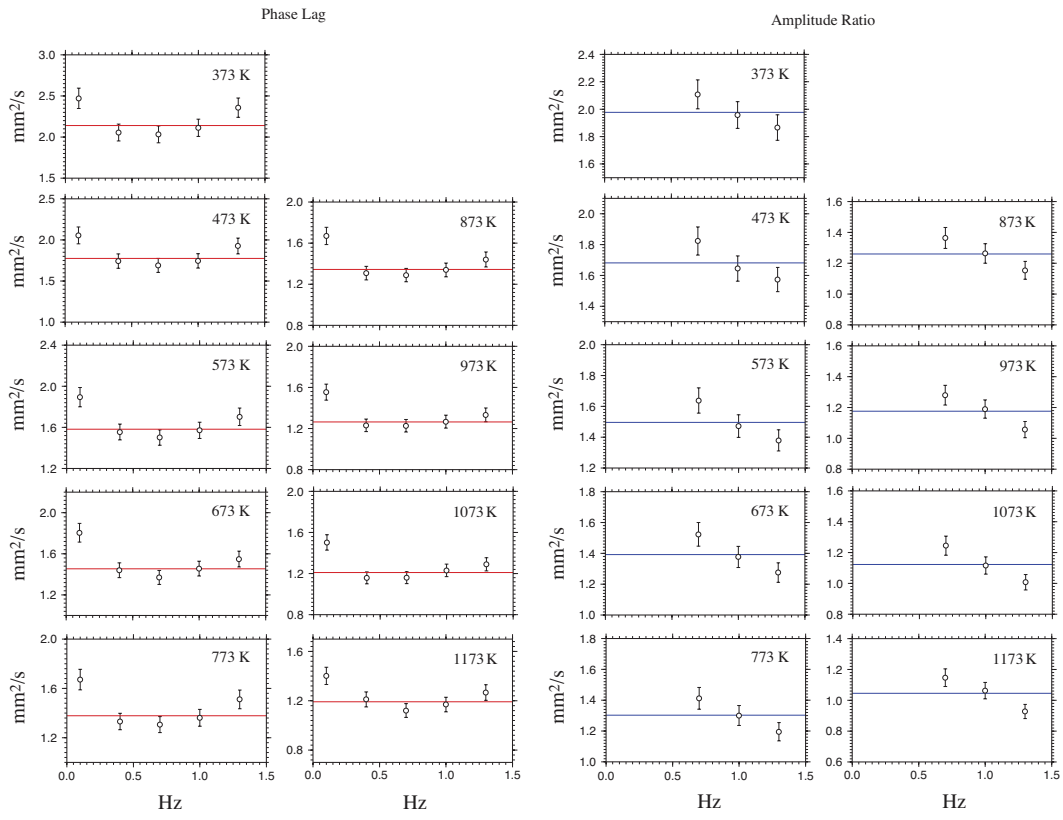

Figure S7: Thermal diffusivity of  $\text{Mg}_{0.80}\text{Fe}_{0.20}\text{O}$  at 8 GPa as a function of frequency, determined from phase lag and amplitude ratio measurements.

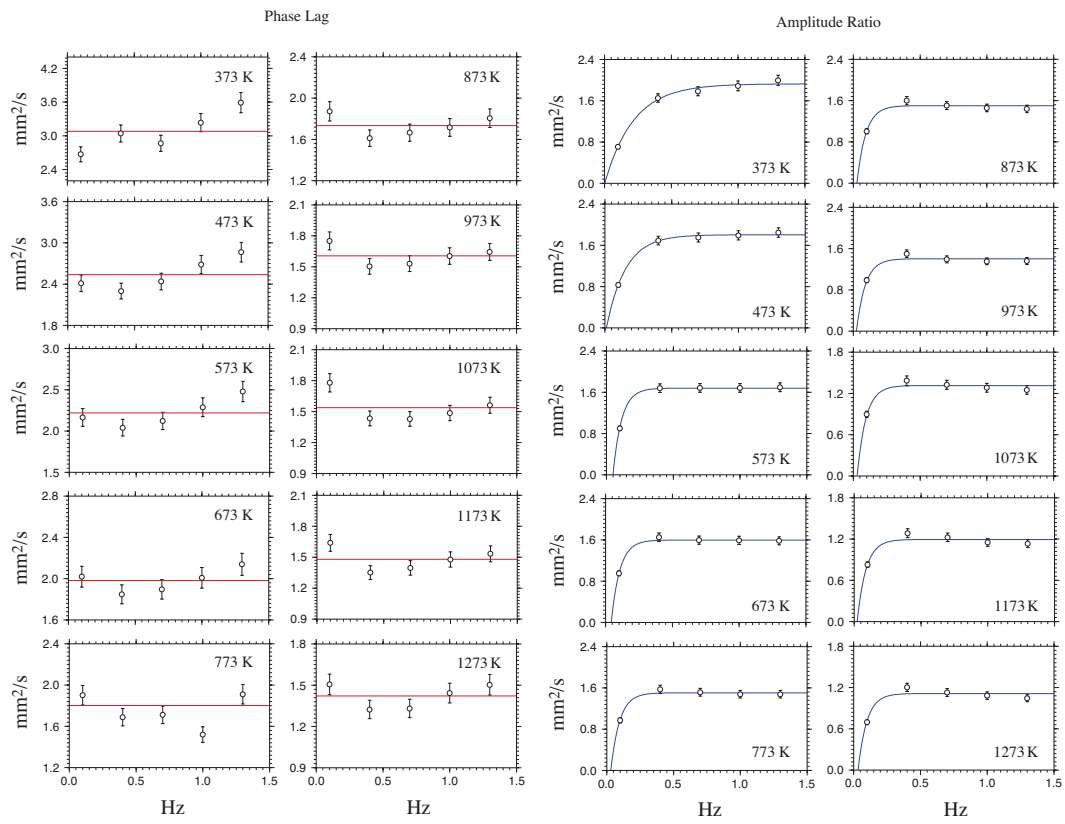

Figure S8: Thermal diffusivity of  $\text{Mg}_{0.80}\text{Fe}_{0.20}\text{O}$  at 14 GPa as a function of frequency, determined from phase lag and amplitude ratio measurements.

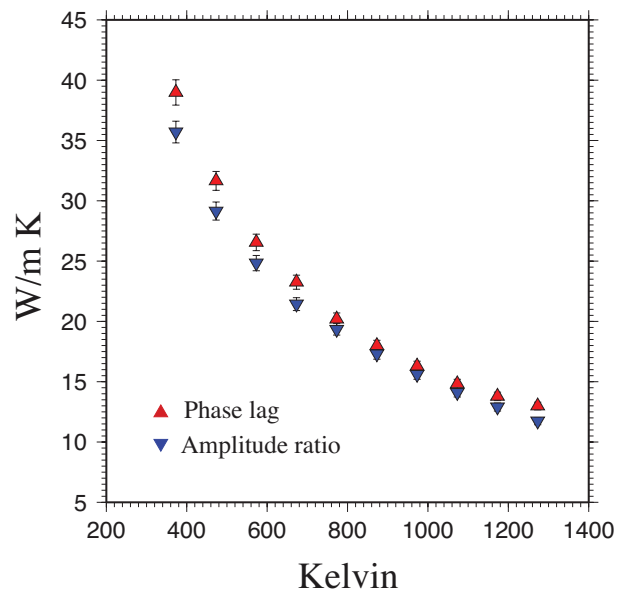

Figure S9: Thermal conductivity of MgO at 8 GPa, determined from phase lag and amplitude ratio diffusivity values.

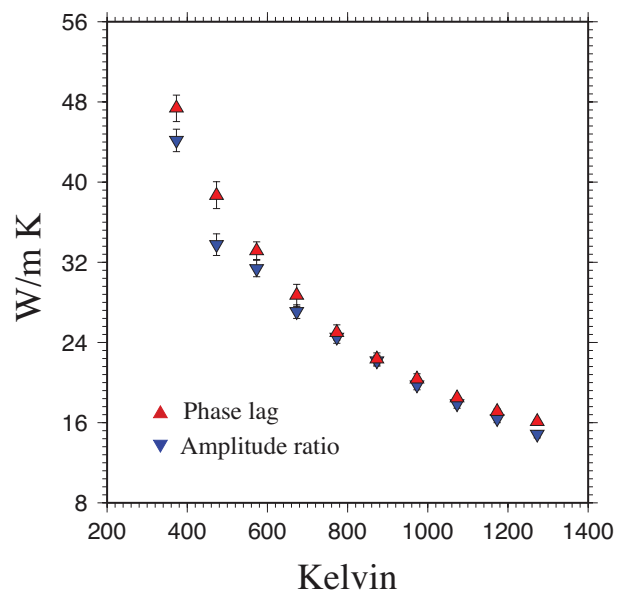

Figure S10: Thermal conductivity of MgO at 14 GPa, determined from phase lag and amplitude ratio diffusivity values.

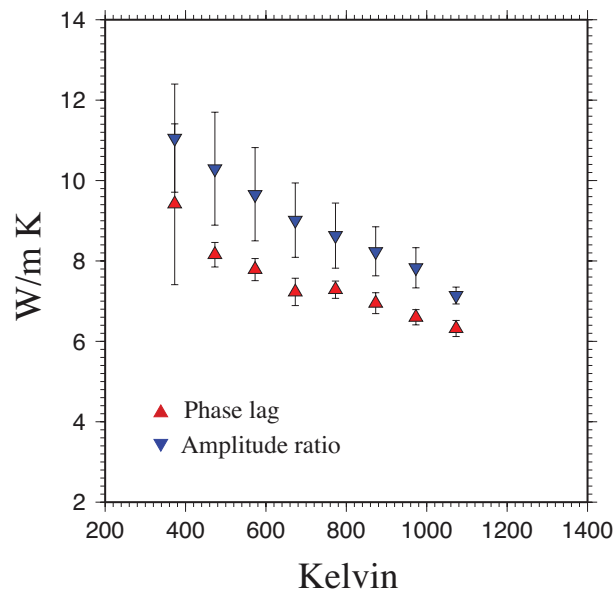

Figure S11: Thermal conductivity of  $\text{Mg}_{0.95}\text{Fe}_{0.05}\text{O}$  at 8 GPa, determined from phase lag and amplitude ratio diffusivity values.

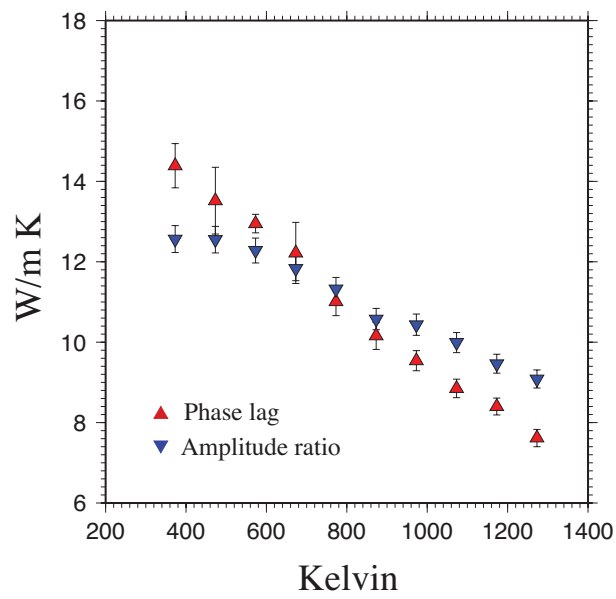

Figure S12: Thermal conductivity of  $\text{Mg}_{0.95}\text{Fe}_{0.05}\text{O}$  at 14 GPa, determined from phase lag and amplitude ratio diffusivity values.

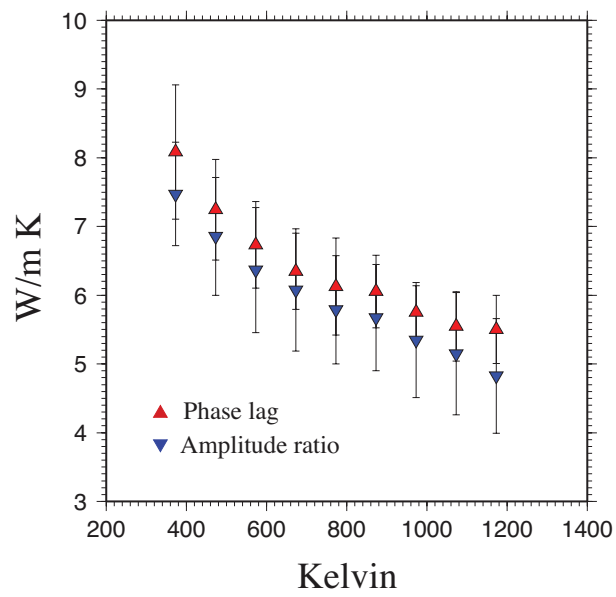

Figure S13: Thermal conductivity of Mg<sub>0.80</sub>Fe<sub>0.20</sub>O at 8 GPa, determined from phase lag and amplitude ratio diffusivity values.

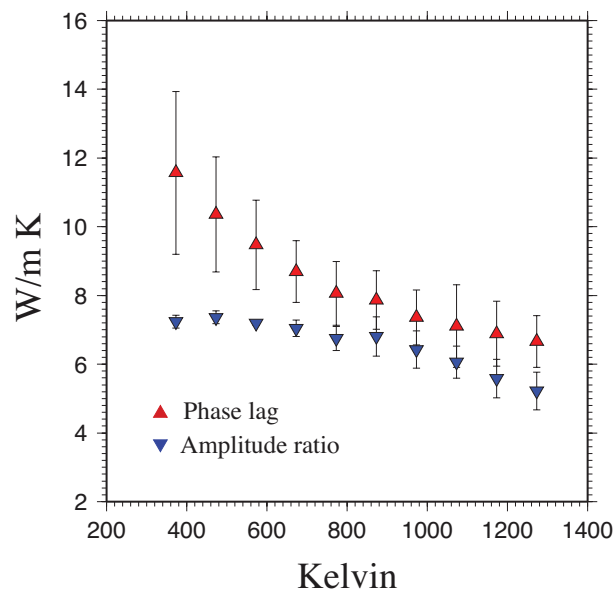

Figure S14: Thermal conductivity of  $\text{Mg}_{0.80}\text{Fe}_{0.20}\text{O}$  at 14 GPa, determined from phase lag and amplitude ratio diffusivity values.



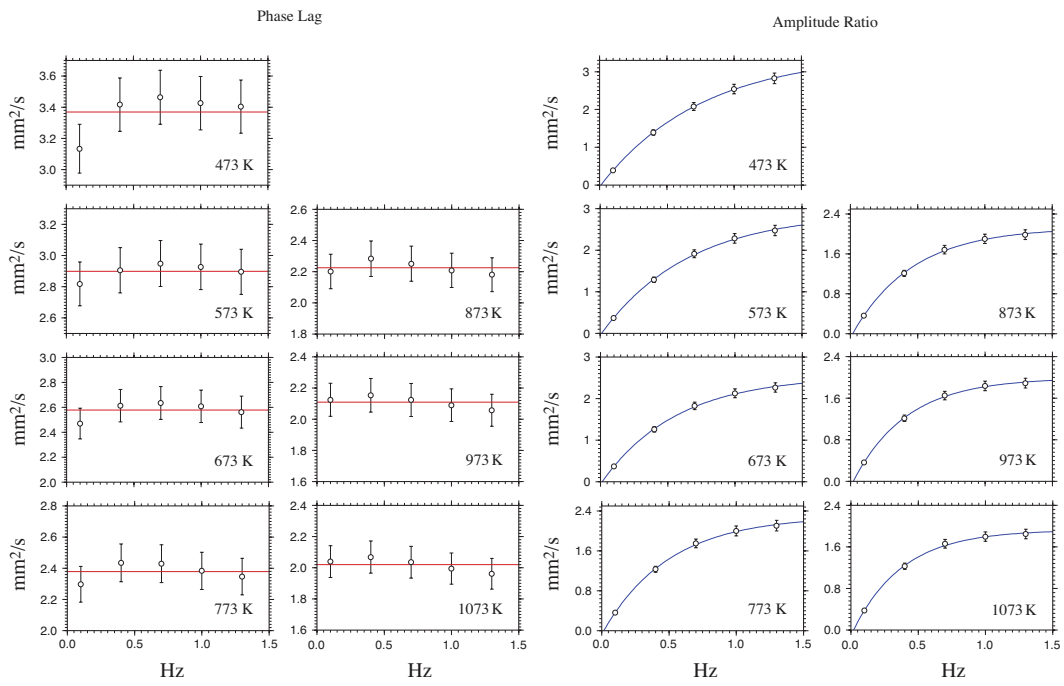

Figure S15: Thermal diffusivity of MgSiO<sub>3</sub> perovskite at 26 GPa as a function of frequency, determined from phase lag and amplitude ratio measurements.

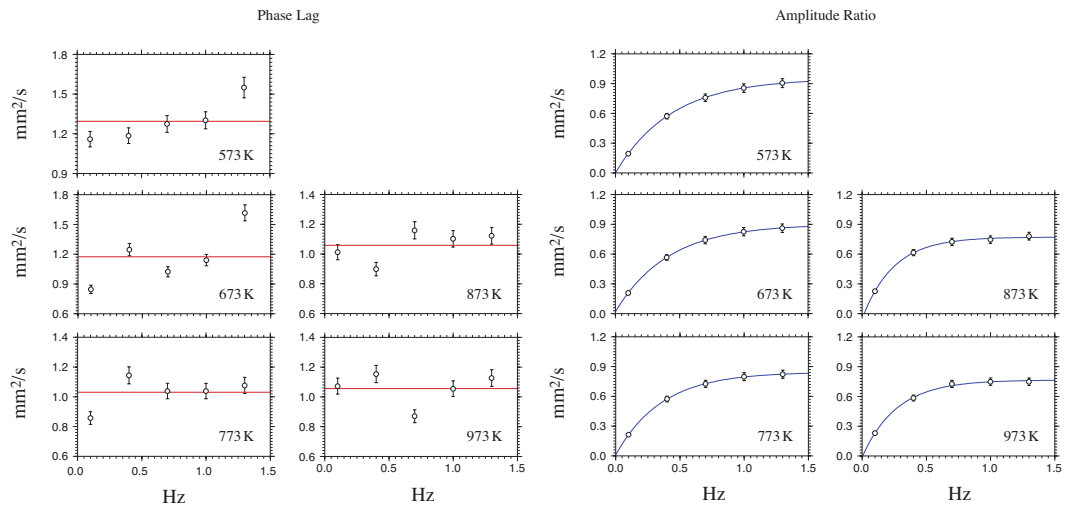

Figure S16: Thermal diffusivity of  $\text{MgSiO}_3 + 3\% \text{FeSiO}_3$  perovskite at 26 GPa as a function of frequency, determined from phase lag and amplitude ratio measurements.

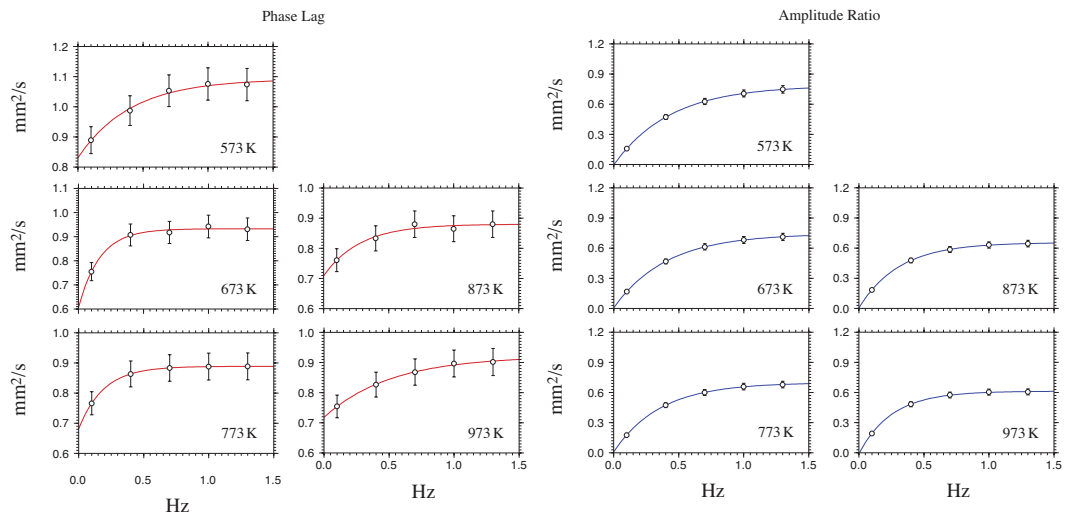

Figure S17: Thermal diffusivity of  $\text{MgSiO}_3 + 2\% \text{AlAlO}_3$  perovskite at 26 GPa as a function of frequency, determined from phase lag and amplitude ratio measurements.

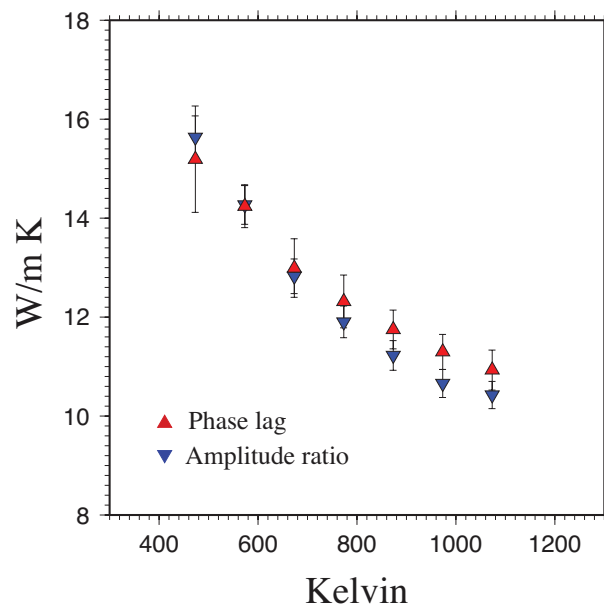

Figure S18: Thermal conductivity of MgSiO<sub>3</sub> perovskite at 26 GPa, determined from phase lag and amplitude ratio diffusivity values.

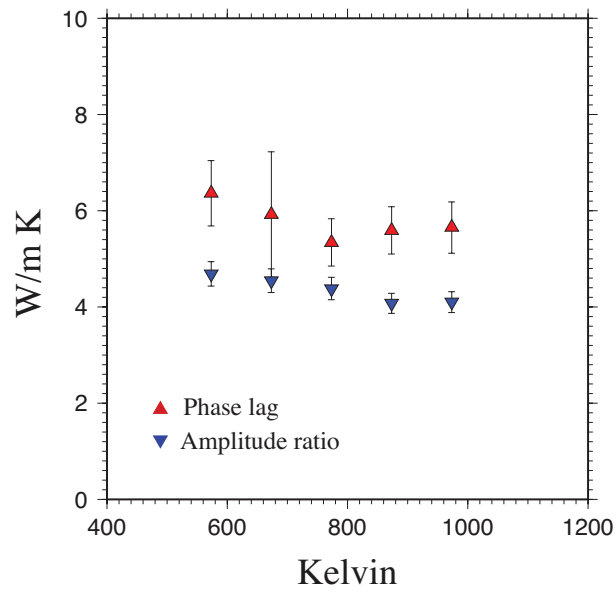

Figure S19: Thermal conductivity of MgSiO<sub>3</sub> + 3% FeSiO<sub>3</sub> perovskite at 26 GPa, determined from phase lag and amplitude ratio diffusivity values.

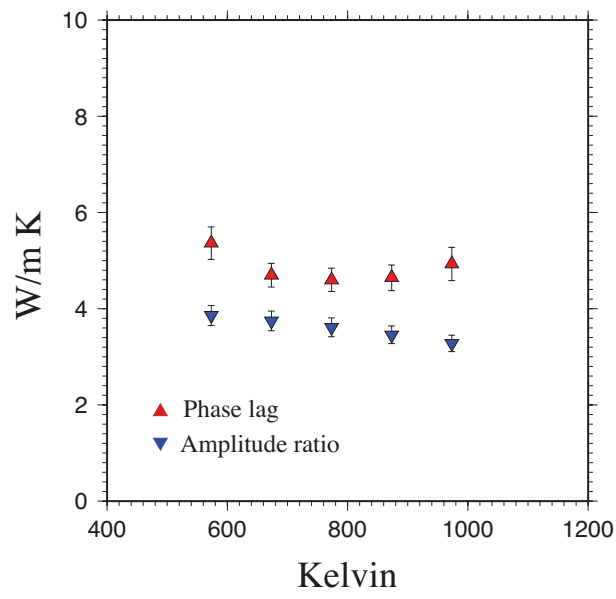

Figure S20: Thermal conductivity of MgSiO<sub>3</sub> + 2% AlAlO<sub>3</sub> perovskite at 26 GPa, determined from phase lag and amplitude ratio diffusivity values.

## 129 References

- 130 Anderson O.L. (1974) The Determination of the Volume Dependence of the Grüneisen  
131 Parameter  $\gamma$ . *Journal of Geophysical Research* **79**, 1153–1155.
- 132 Callen H.B. (1985) *Thermodynamics and an Introduction to Thermostatistics*. John  
133 Wiley & Sons, New York, 2nd edition.
- 134 de Koker N. and Stixrude L. (2009) Self-Consistent Thermodynamic Description of  
135 Silicate Liquids, with Application to Shock Melting of MgO Periclase and MgSiO<sub>3</sub>  
136 Perovskite. *Geophysical Journal International* **178**, 162–179.
- 137 Frost D., Poe B., Trønnes R., Liebske C., Duba A. and Rubie D. (2004) A new  
138 large-volume 6-8 multianvil system. *Physics of the Earth and Planetary Interiors*  
139 **143-144**, 507–514.
- 140 Fujisawa H.a., Fujii N., Mizutani H., Kanamori H. and Akimoto S. (1968) Thermal  
141 diffusivity of Mg<sub>2</sub>SiO<sub>4</sub>, Fe<sub>2</sub>SiO<sub>4</sub> and NaCl at high pressures and temperatures.  
142 *Journal of Geophysical Research* **73**, 4727–4733.
- 143 Ita J. and Stixrude L. (1992) Petrology, Elasticity, and Composition of the Mantle  
144 Transition Zone. *Journal of Geophysical Research* **97**, 6849–6866.
- 145 Karki B.B., Wentzcovitch R.M., De Gironcoli S. and Baroni S. (2000) High-pressure  
146 lattice dynamics and thermoelasticity of MgO. *Physical Review B* **61**, 8793–8800.
- 147 Oganov A.R. and Dorogokupets P.I. (2003) All-electron and pseudopotential study  
148 of MgO: Equation of state, anharmonicity, and stability. *Physical Review B* **67**,  
149 doi: 10.1103/PhysRevB.67.224110.
- 150 Stixrude L. and Lithgow-Bertelloni C. (2005) Thermodynamics of mantle minerals -  
151 I. Physical properties. *Geophysical Journal International* **162**, 610–632.
- 152 Xu W., Lithgow-Bertelloni C. and Stixrude L. (2008) The effect of bulk composition  
153 and temperature on mantle seismic structure. *Earth and Planetary Science Letters*  
154 **275**, 70–79.
- 155 Xu Y., Shankland T.J., Linhardt S., Rubie D.C., Langenhorst F. and Klasinksi K.  
156 (2004) Thermal diffusivity and conductivity of olivine, wadsleyite and ringwoodite  
157 to 20 GPa and 1373 K. *Physics of the Earth and Planetary Interiors* **143-144**,  
158 321–326.

159 Zhang S. and Jin J. (1996) *Computation of Special Functions*. John Wiley & Sons,  
160 New York.
